# Supplementary material for: The metabesity factor HMG20A potentiates astrocyte survival and reactive astrogliosis preserving neuronal integrity
Source: PubMed Central journal article supplement (PMC8171100; doi:10.7150/thno.57237), 2021-05-12
Supplement: thnov11p6983s1.pdf [file thnov11p6983s1.pdf]

# Supplemental Material

**The metabesity factor HMG20A potentiates astrocyte survival and reactive astrogliosis preserving neuronal integrity**

Petra I. Lorenzo *et al.*

| ID           | Forward primer         | Reverse primer          |
|--------------|------------------------|-------------------------|
| <b>Mouse</b> |                        |                         |
| Hmg20a       | AACCAACCCAGAGTTTGTGG   | TTGCTCATCTTCAGGCCTTT    |
| Gfap         | GGGGCAAAGCACCAAAGAAG   | GGGACAACCTTGATTGTGAGCC  |
| Vimentin     | CGTCCACACGCACCTACAG    | GGGGGATGAGGAATAGAGGCT   |
| Il1b         | AACTGTTGGTGAGGAATGTGG  | GGTCCTGTCCCTCTTGTTTTCA  |
| Slc1a2       | ACAATATGCCCAAGCAGGTAGA | CTTTGGCTCATCGGAGCTGA    |
| Ereg         | CTGCCTCTTGGGTCTTGACG   | GCGGTACAGTTATCCTCGGATTC |
| Srebf2       | GCAGCAACGGGACCATTCT    | CCCCATGACTAAGTCCTTCAACT |
| Igfbp3       | GACGACGTACATTGCCTCAG   | GTCTTTTGTGCAAATAAGGCATA |
| Tgfb1        | CTCCCGTGGCTTCTAGTGC    | GCCTTAGTTTGGACAGGATCTG  |
| Vcam1        | TTGGGAGCCTCAACGGTACT   | GCAATCGTTTTGTATTCAGGGGA |
| Gapdh        | CACCAACTGCTTAGCCCC     | TCTTCTGGGTGGCAGTGATG    |
| Cyclophilin  | ATGGCAAATGCTGGACCAA    | GCCATCCAGCCATTCAGTCT    |
| <b>Human</b> |                        |                         |
| HMG20A       | GCATGAAGATGAGCAACGAA   | GCTCATTTCATGAACCGAACA   |
| ACTB         | AAACTGGAACGGTGAAGGTG   | GTGGCTTTTAGGATGGCAAG    |
| HIST1H2AB    | CGGTGCTTGAGTACCTGACC   | TTCACTTTCCCTTGGCCTTA    |

**TABLE S1:** List of primers used in this study.

| <b>Primary antibodies</b>        | <b>Host</b> | <b>Dilution</b> | <b>Supplier</b>           | <b>Catalog number</b> |
|----------------------------------|-------------|-----------------|---------------------------|-----------------------|
| HMG20A                           | Rabbit      | 1:1000          | Sigma-Aldrich             | HPA008126             |
| Insulin                          | Mouse       | 1:500           | Sigma-Aldrich             | I2018                 |
| Glucagon                         | Mouse       | 1:200           | Sigma-Aldrich             | A944                  |
| Somatostatin                     | Goat        | 1:100           | Santa Cruz Biotechnology  | SC-7819               |
| Vimentin                         | Rat         | 1:200           | Santa Cruz Biotechnology  | SC-32322              |
| GFAP                             | Mouse       | 1:500           | Sigma-Aldrich             | G3893                 |
| GAPDH                            | Rabbit      | 1:1000          | Cell Signaling Technology | 14C10                 |
| STAT3                            | Rabbit      | 1:1000          | Cell Signaling Technology | 9132                  |
| Phospho-STAT3                    | Rabbit      | 1:1000          | Cell Signaling Technology | 9145                  |
| IBA1                             | Rabbit      | 1:200           | WAKO                      | 019-19741             |
| OLIG2                            | Mouse       | 1:100           | Sigma-Aldrich             | MABN50                |
| NeuN                             | Mouse       | 1:100           | Merk Millipore            | M377                  |
| <b>Secondary antibodies</b>      | <b>Host</b> | <b>Dilution</b> | <b>Supplier</b>           | <b>Catalog number</b> |
| Rhodamine Red Anti-rabbit        | Goat        | 1:400           | Jackson ImmunoResearch    | 111-295-003           |
| Fluorescein anti-mouse           | Goat        | 1:400           | Jackson ImmunoResearch    | 115-095-071           |
| Alexa fluor 568 goat anti-rabbit | Goat        | 1:800           | Thermo Fisher Scientific  | A11011                |
| Alexa fluor 488 goat anti-mouse  | Goat        | 1:800           | Thermo Fisher Scientific  | A11001                |
| HRP anti-rabbit                  | Goat        | 1:1000          | Sigma-Aldrich             | AP307P                |

**TABLE S2:** List of antibodies used in this study.

**A**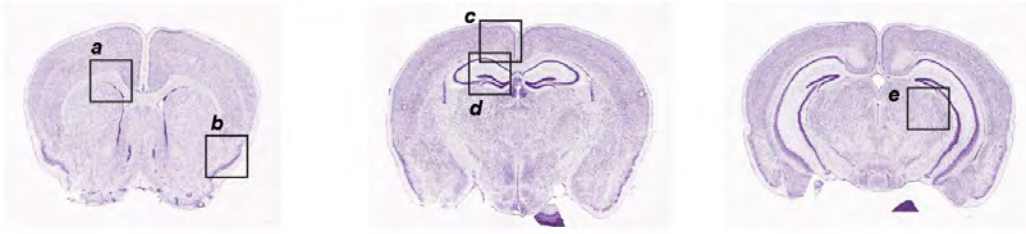**B**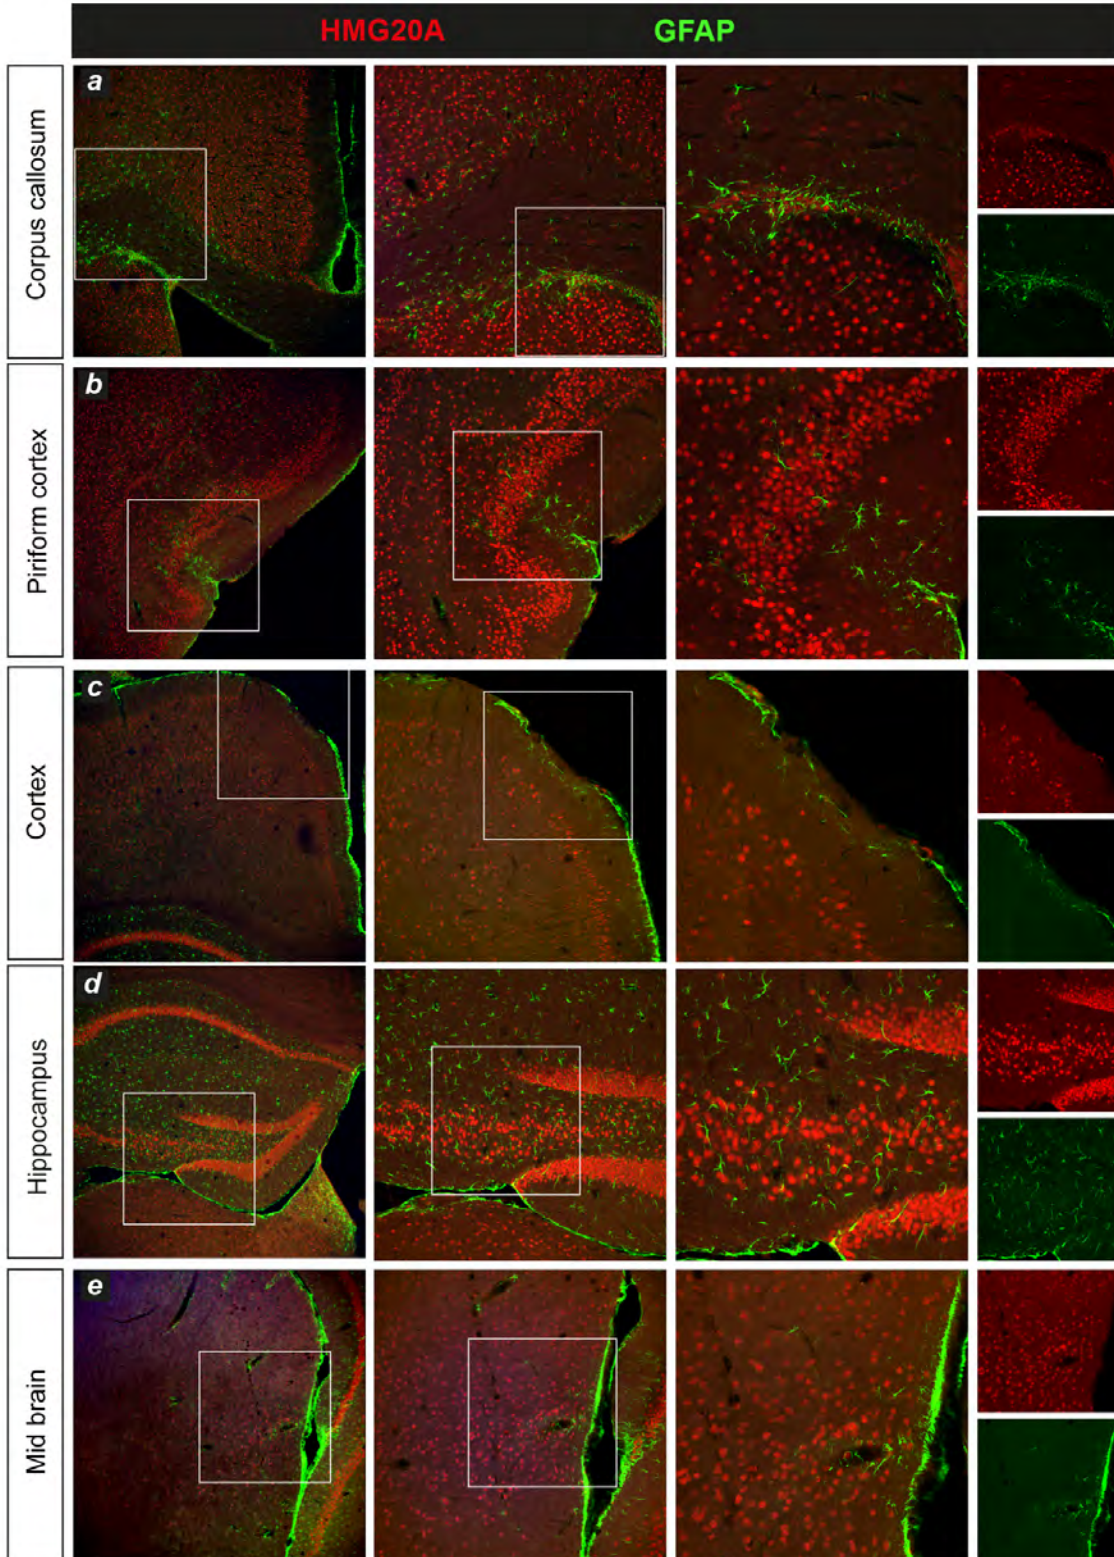

**Figure S1. HMG20A expression pattern in mouse brain neurons.** (A) Anatomical areas of the brain shown in (B) taken from the Allen Brain Atlas (<https://mouse.brain-map.org/>). (B) HMG20A (red) expression was assessed by immunofluorescence and was co-localized with NeuN (green, right panels) expressing neurons in various brain areas as depicted in the figure. Magnification: 10X

**A**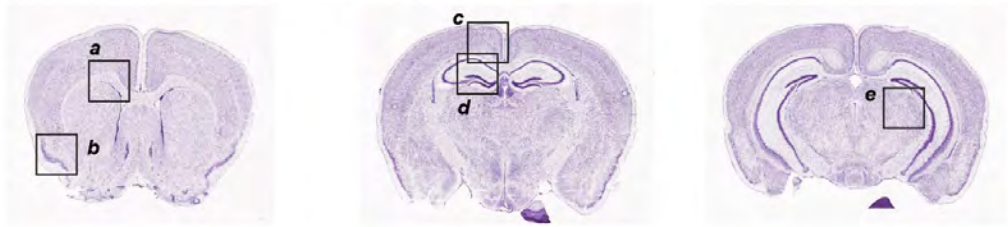**B**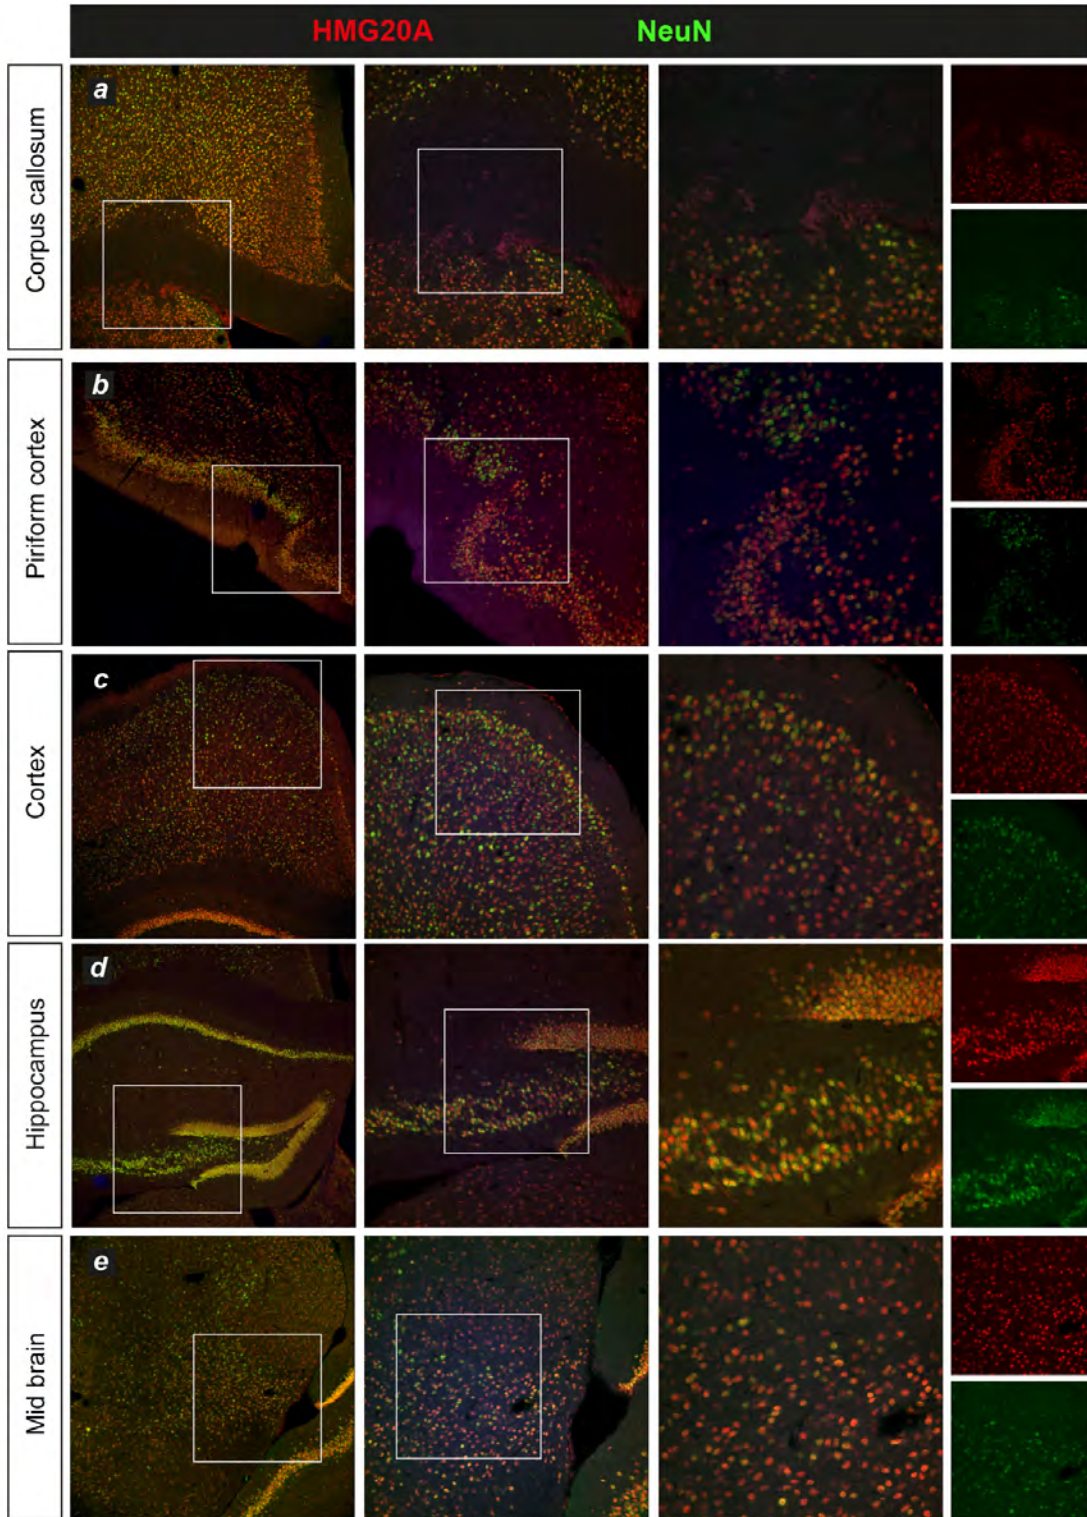

**Figure S2. HMG20A expression pattern in mouse brain astrocytes.** (A) Anatomical areas of the brain shown in (B) taken from the Allen Brain Atlas (<https://mouse.brain-map.org/>). (B) HMG20A (red) expression was assessed by immunofluorescence and was co-localized with NeuN (green, left panels) expressing astrocytes in various brain areas as depicted in the figure. Magnification: 10X

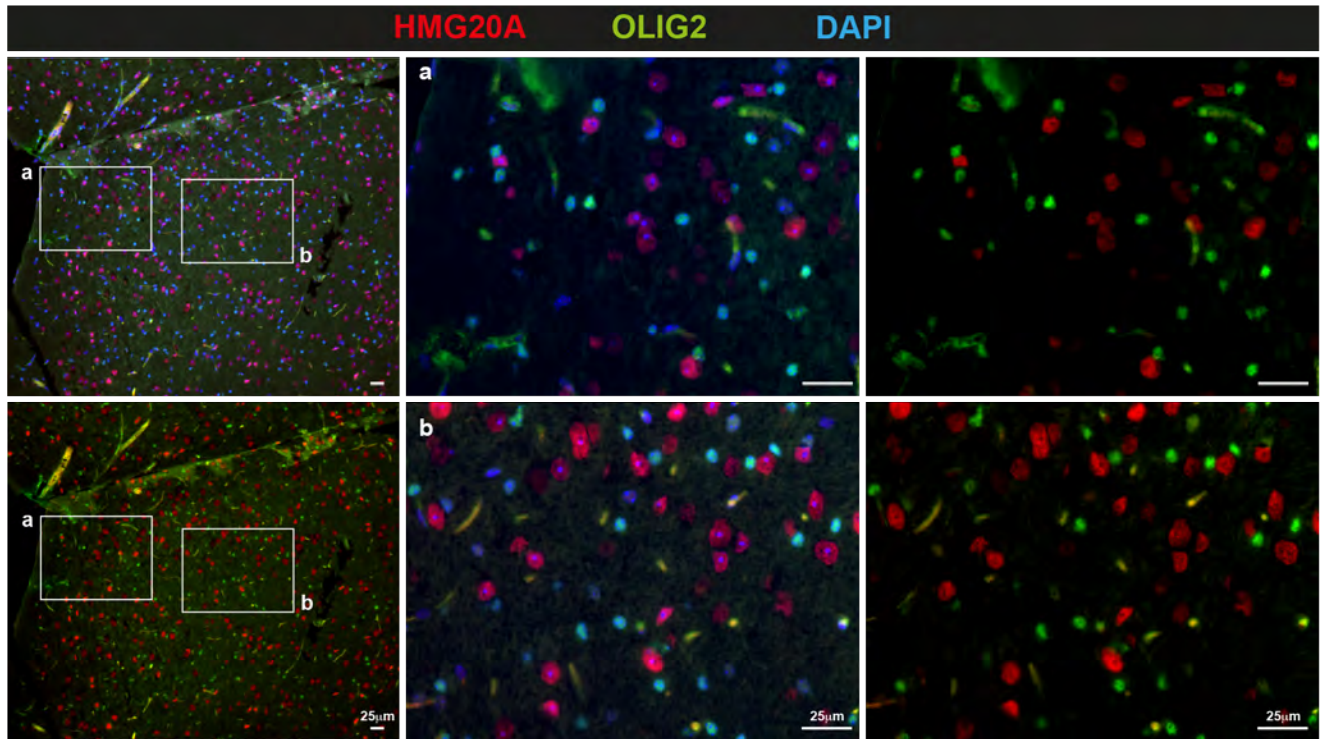

**Figure S3. HMG20A is not expressed in oligodendrocytes.** Fluorescence microscope images of brain paraffin sections immunostained for HMG20A (red) and the oligodendrocyte marker OLIG2. Scale bar: 25 $\mu$ m.

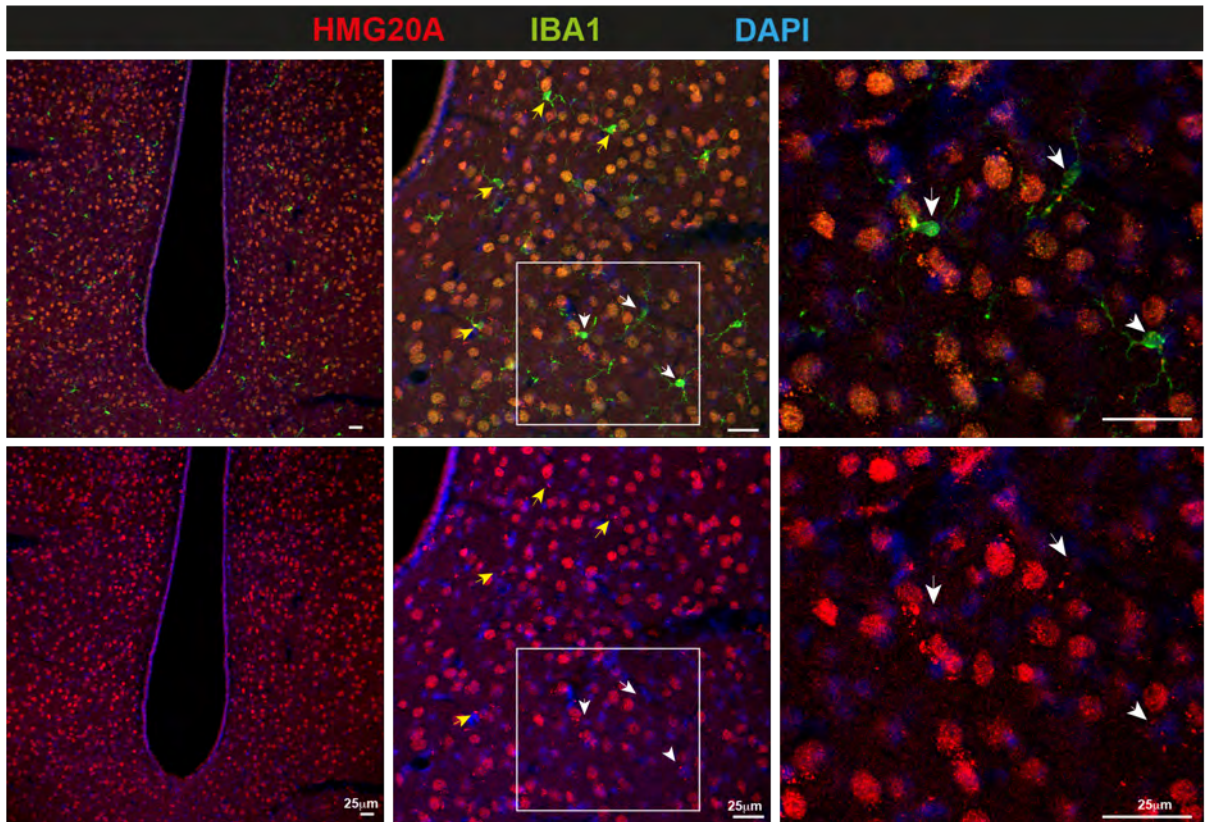

**Figure S4. HMG20A is not expressed in microglia.** Confocal microscope images of brain vibratome sections immunostained for HMG20A (red) and the microglia marker IBA1 (Green). Arrows point to microglial cells. Scale bar: 25µm.

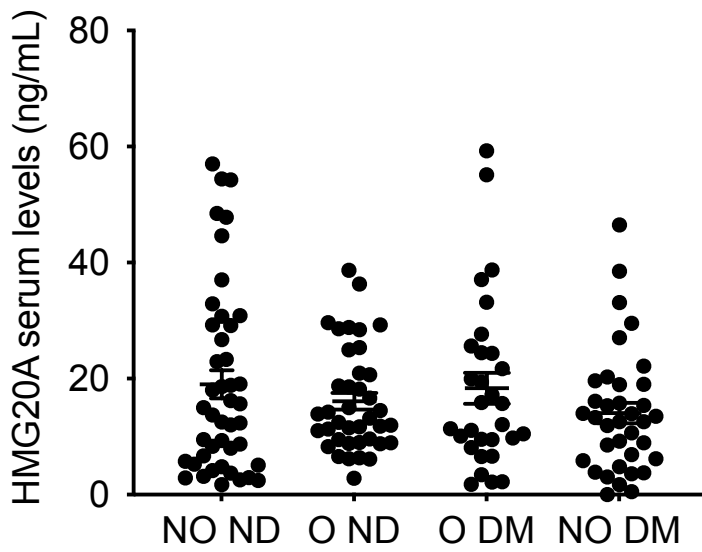

**Figure S5. HMG20A serum levels.** Quantification of HMG20A protein levels in serum isolated from the various groups depicted in the graph using an ELISA kit for human HMG20A.  $n = 40-50$  individuals per group analyzed in duplicate.







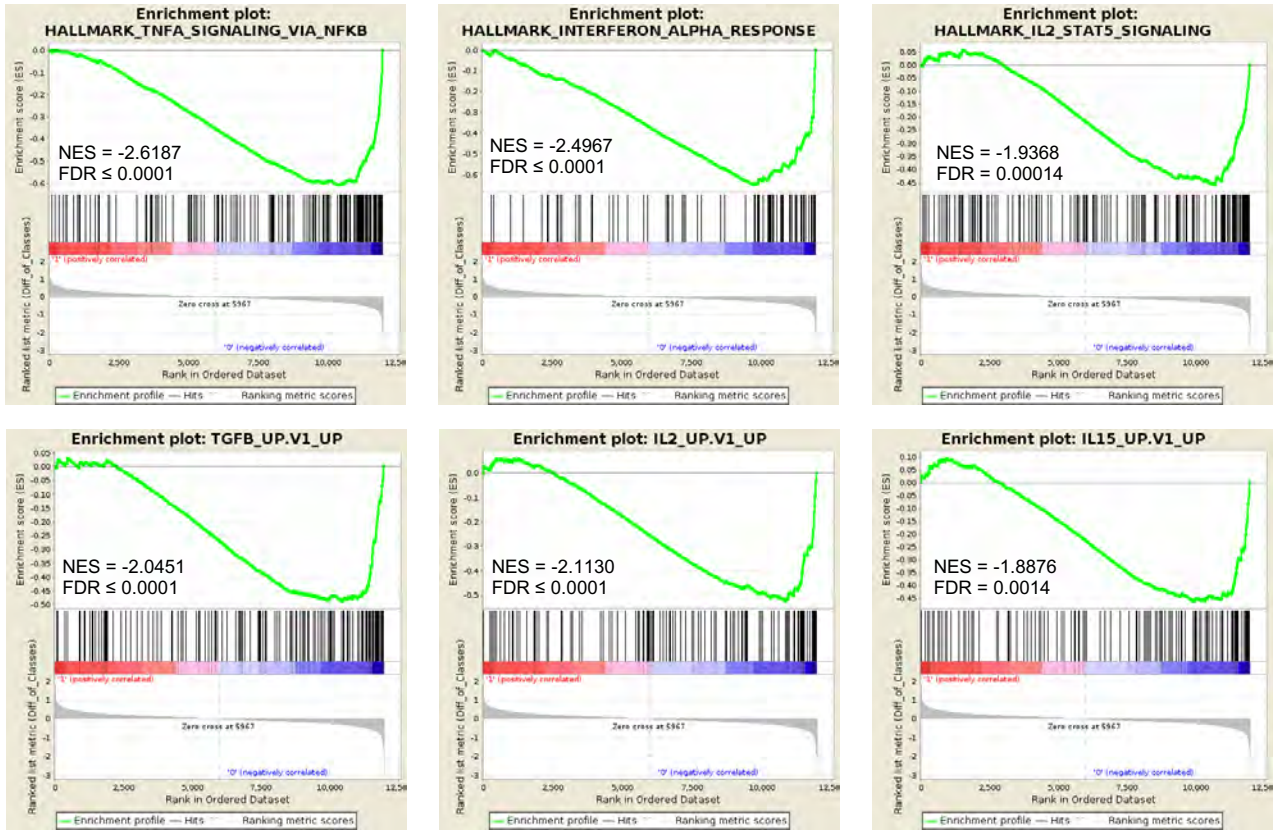

**Figure S8. Pathways enriched after *Hmg20a* silencing.** Enrichment plots of key inflammatory pathway enriched after *Hmg20a* silencing. The analysis was performed using the GSEA software. Normalized Enriched Score and FDR are provided within each plots.

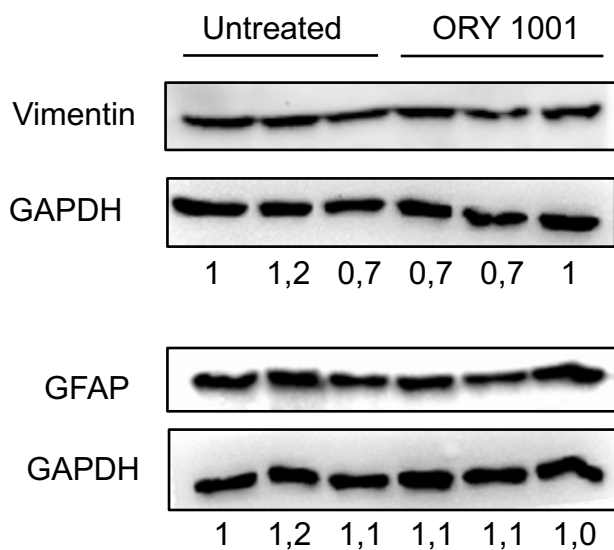

**Figure S9. GFAP and VIMENTIN levels in ORY-1001-treated astrocytes.** Protein levels of GFAP and VIMENTIN were assessed in whole cell extracts of astrocytes cultured or not with ORY-1001 for 72 hours. Values shown below are the relative expression levels of each protein normalized to GAPDH.
